# Supplementary material for: A shared genetic basis of mimicry across swallowtail butterflies points to ancestral co-option of doublesex
Source: PubMed Central journal article supplement (PMC6941989; doi:10.1038/s41467-019-13859-y), 2020-01-03
Supplement: 41467_2019_13859_MOESM3_ESM.pdf [file 41467_2019_13859_MOESM3_ESM.pdf]

## **Description of Additional Supplementary Files**

File Name: Supplementary Data 1

Description: Sample information and sequencing statistics.
